# Supplementary material
Source: PubMed Central journal article supplement (PMC5781317)
Supplement: now232_suppl_supplementary_figure_s9.pdf [file now232_suppl_supplementary_figure_s9.pdf]

**A**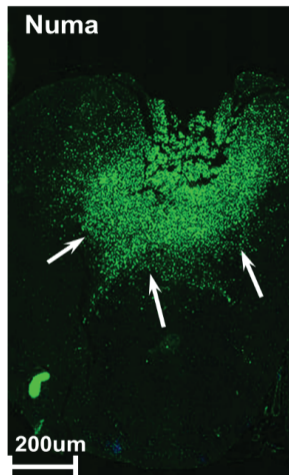

HR-GSC1 shRest  
/shmiR-NT

**B**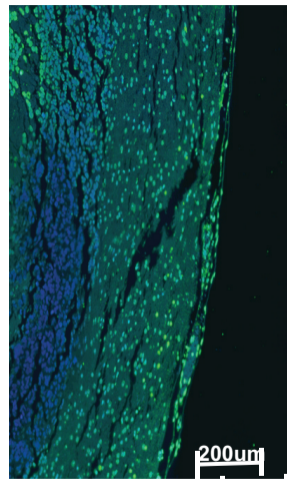

HR-GSC1 shRest  
/shmiR-124

**C**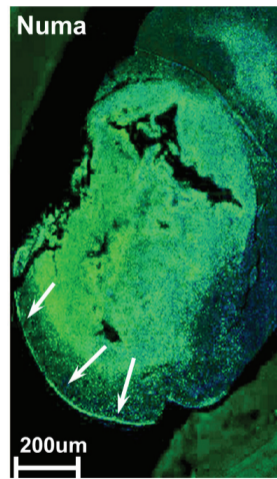

HR-GSC1 shRest  
/shmiR-203

**D**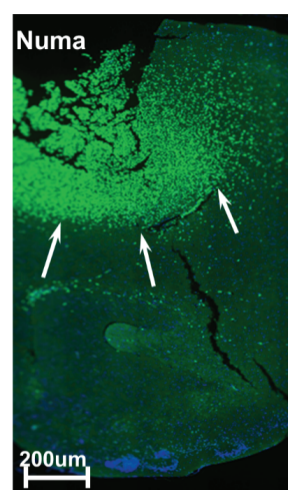

HR-GSC2 shRest  
/shmiR-NT

**E**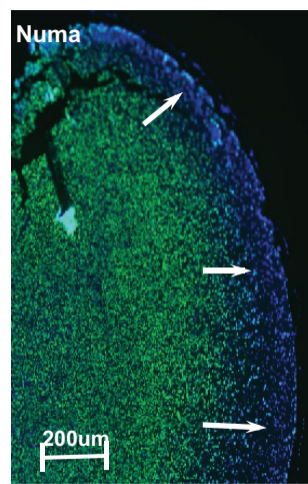

HR-GSC2 shRest  
/shmiR-124

**F**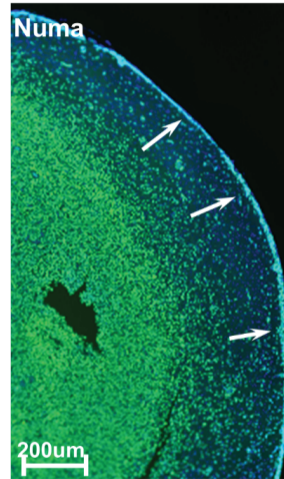

HR-GSC2 shRest  
/shmiR-203
