# Supplementary material
Source: PubMed Central journal article supplement (PMC5781317)

A

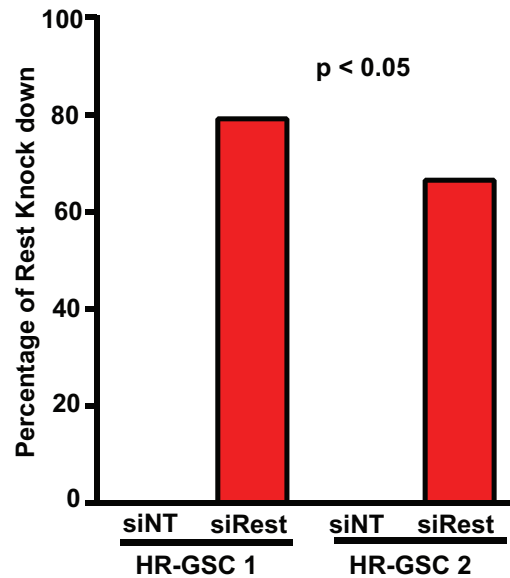

B

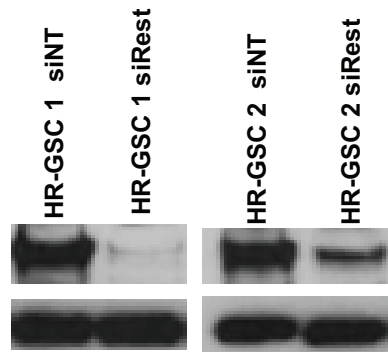

C

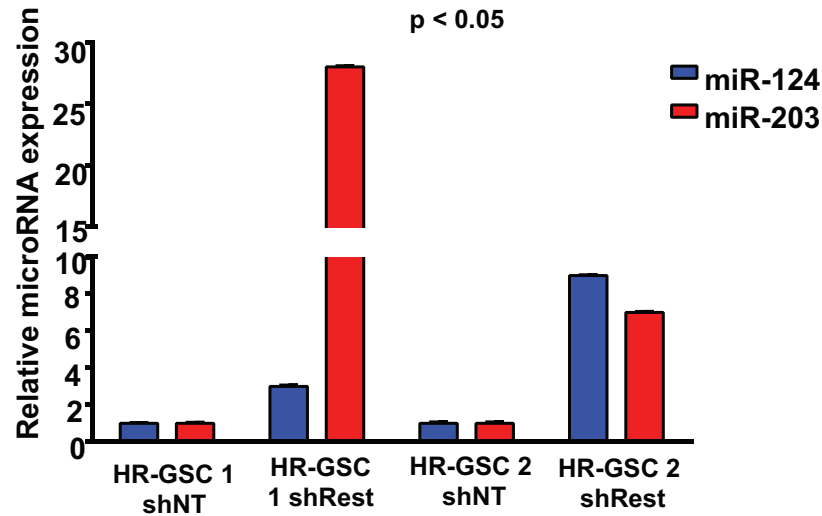

Supplement: now232_suppl_supplementary_figure_s1.pdf [file now232_suppl_supplementary_figure_s1.pdf]

A

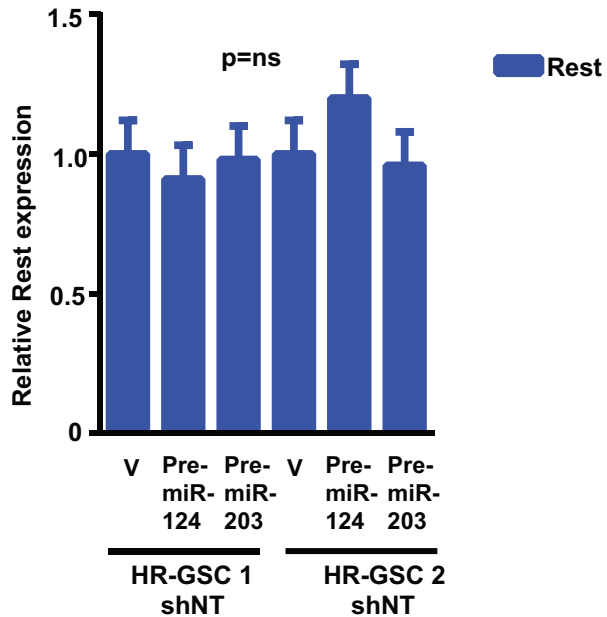

B

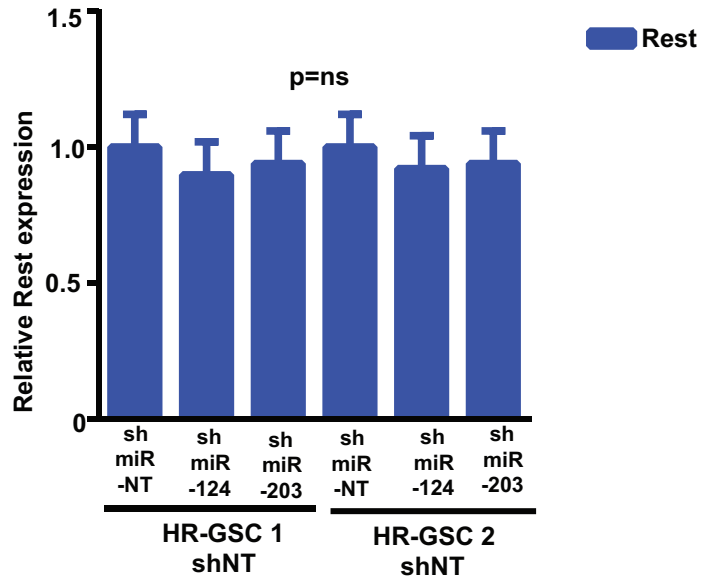

Supplement: now232_suppl_supplementary_figure_s10.pdf [file now232_suppl_supplementary_figure_s10.pdf]

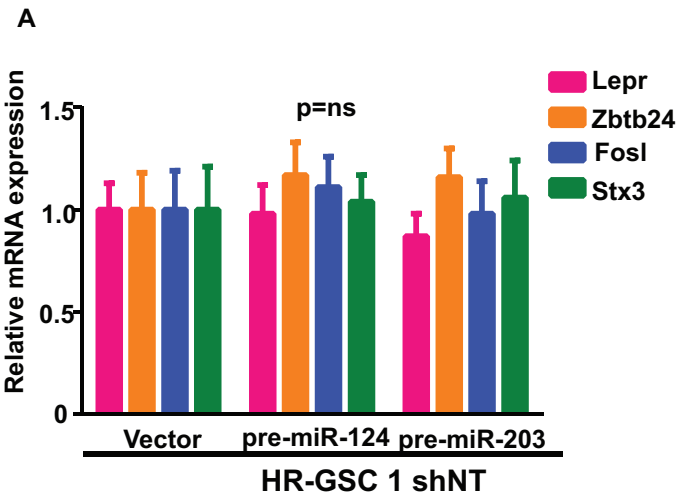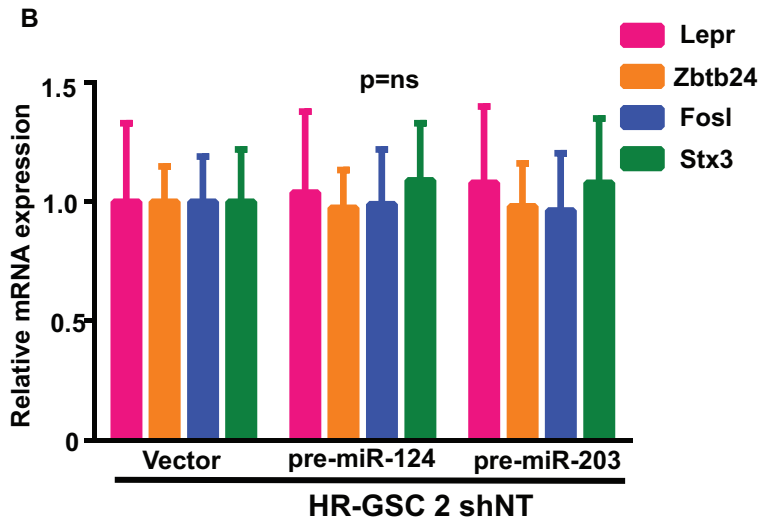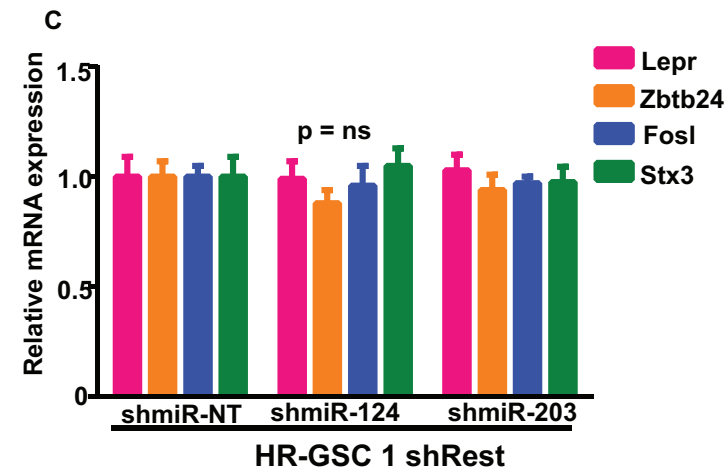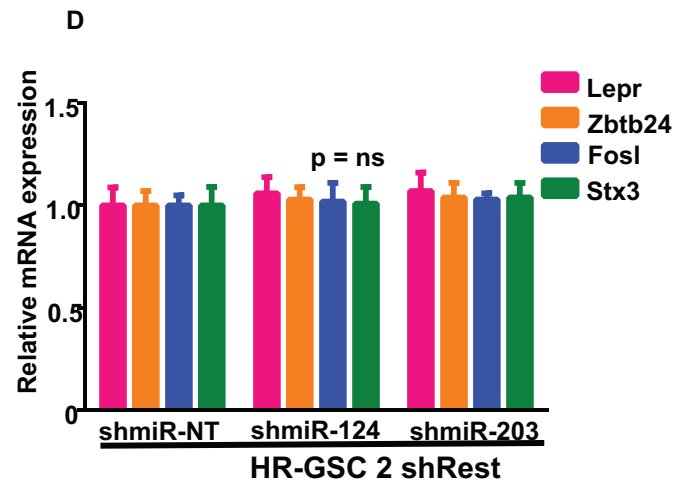

Supplement: now232_suppl_supplementary_figure_s11.pdf [file now232_suppl_supplementary_figure_s11.pdf]

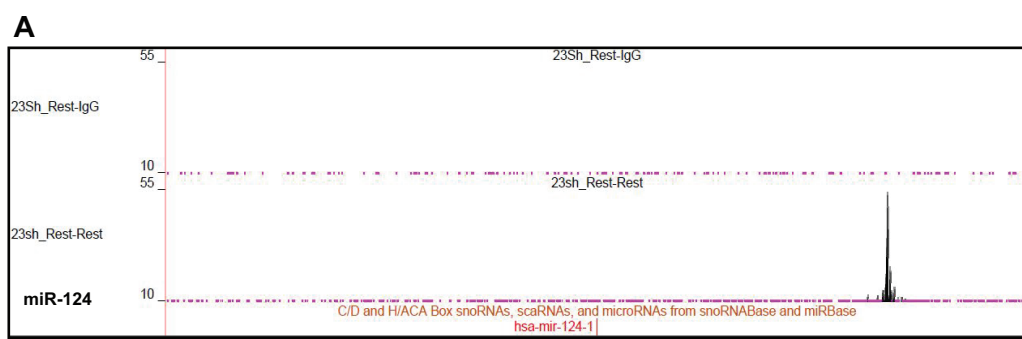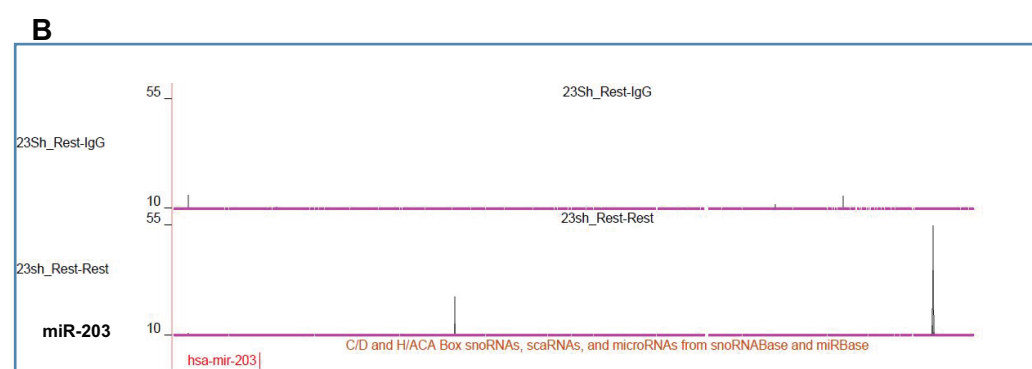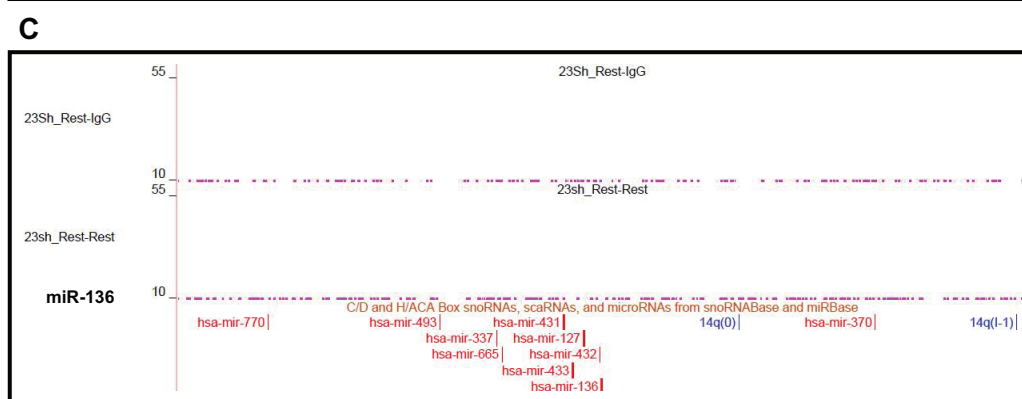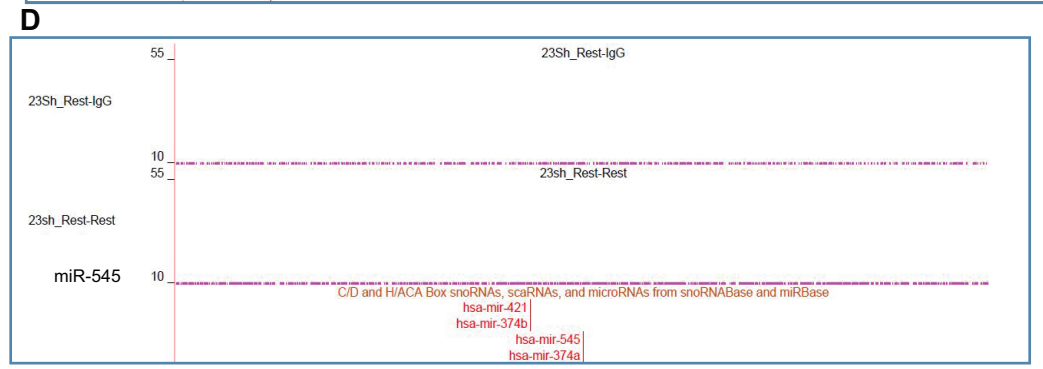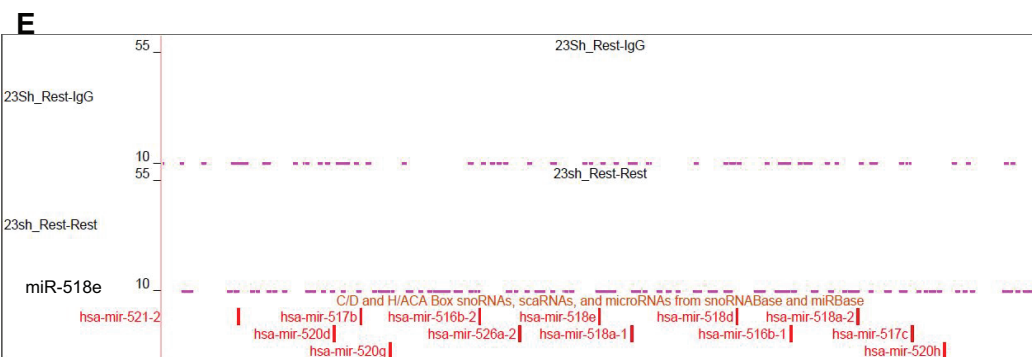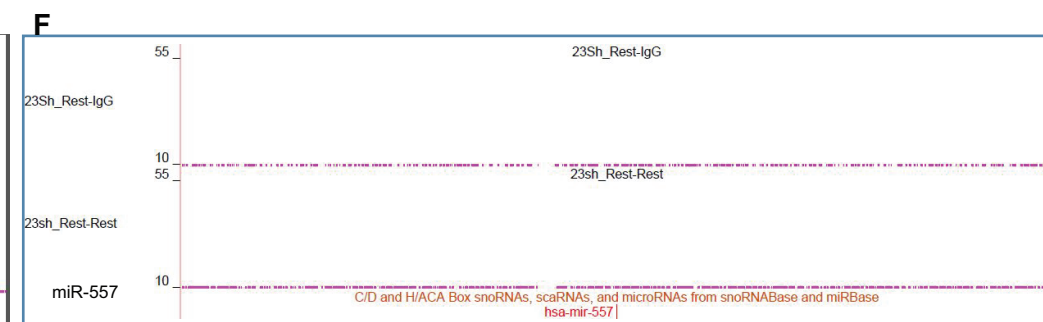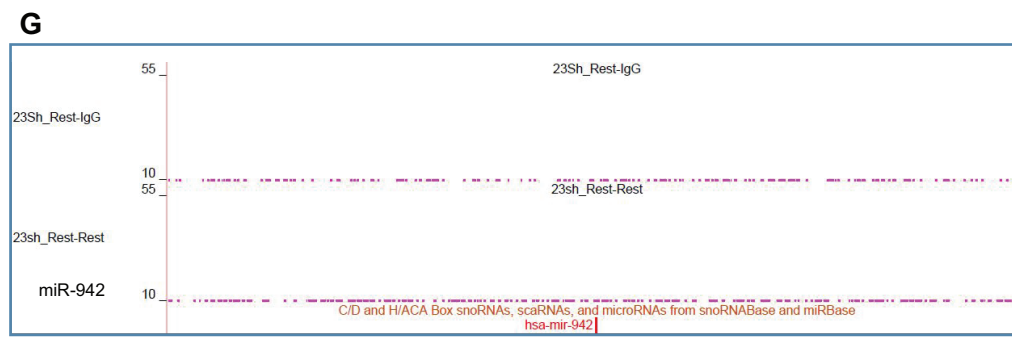

Supplement: now232_suppl_supplementary_figure_s2.pdf [file now232_suppl_supplementary_figure_s2.pdf]

A

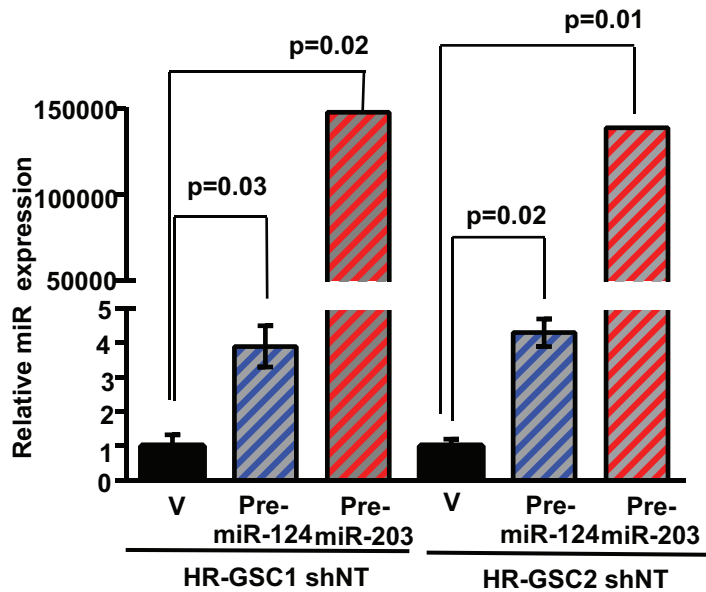

B

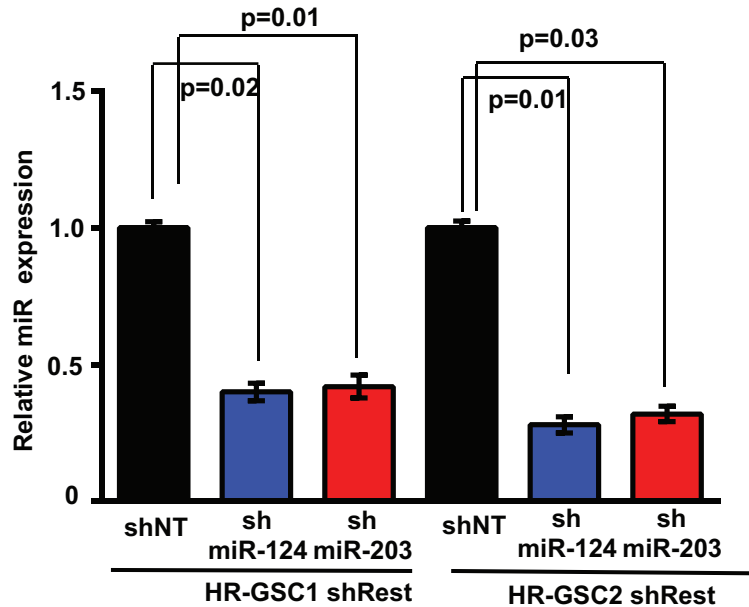

Supplement: now232_suppl_supplementary_figure_s3.pdf [file now232_suppl_supplementary_figure_s3.pdf]

A

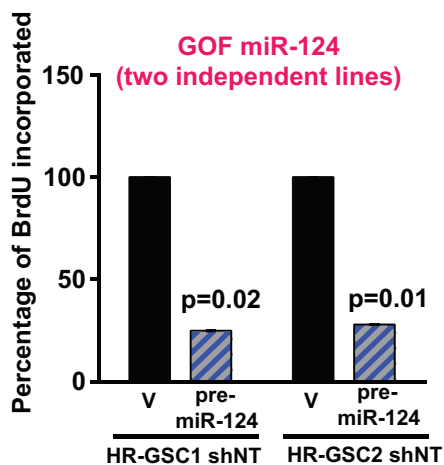

B

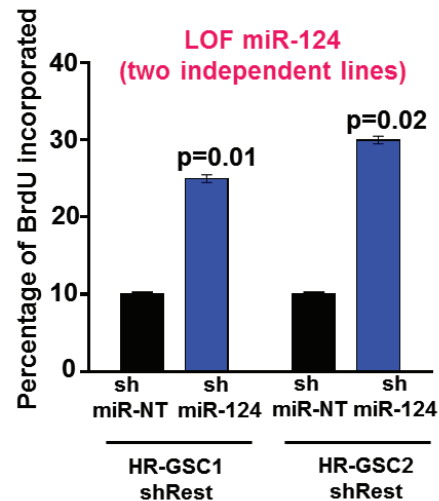

C

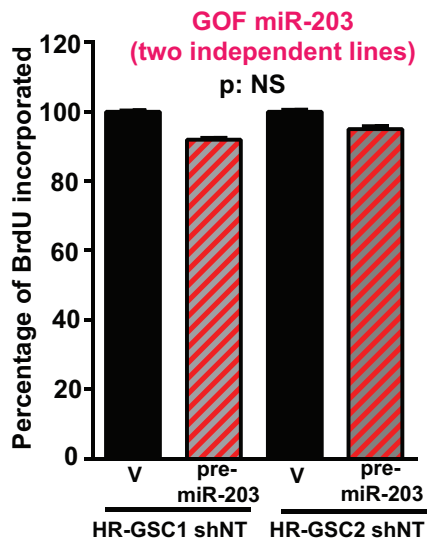

D

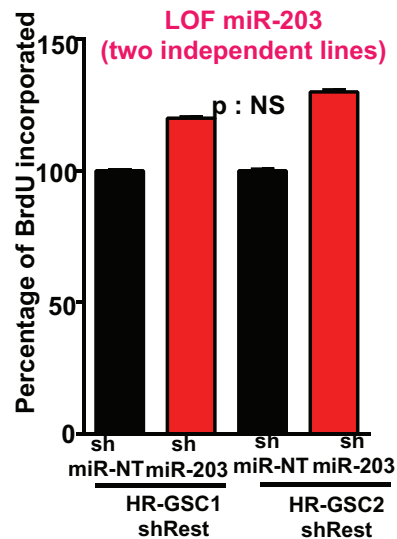

Supplement: now232_suppl_supplementary_figure_s4.pdf [file now232_suppl_supplementary_figure_s4.pdf]

A

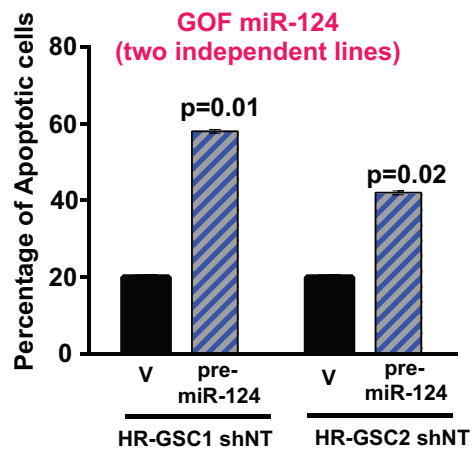

B

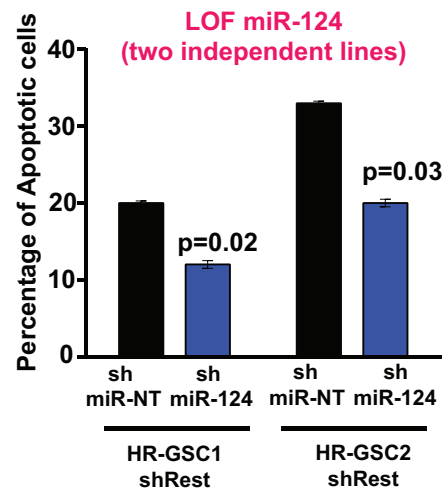

C

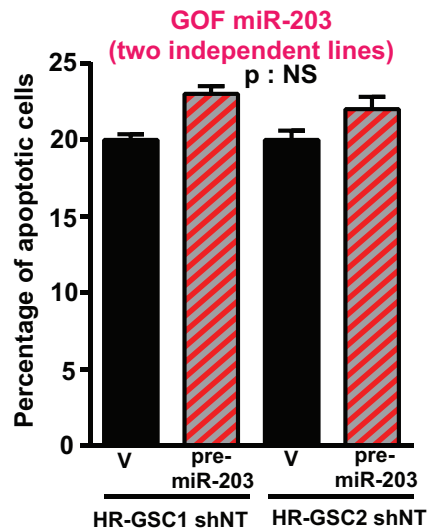

D

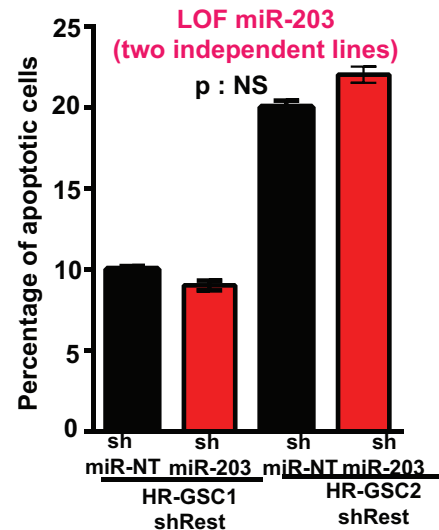

Supplement: now232_suppl_supplementary_figure_s6.pdf [file now232_suppl_supplementary_figure_s6.pdf]

A

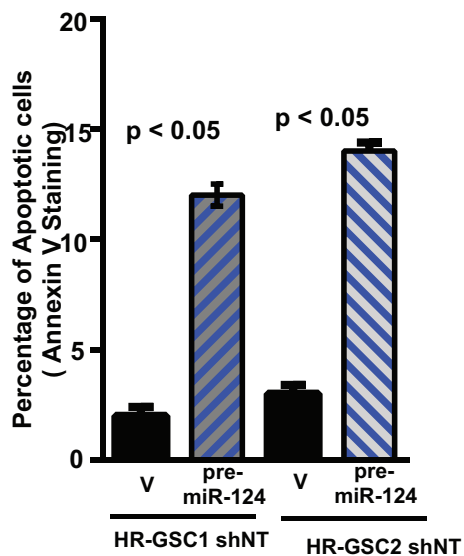

B

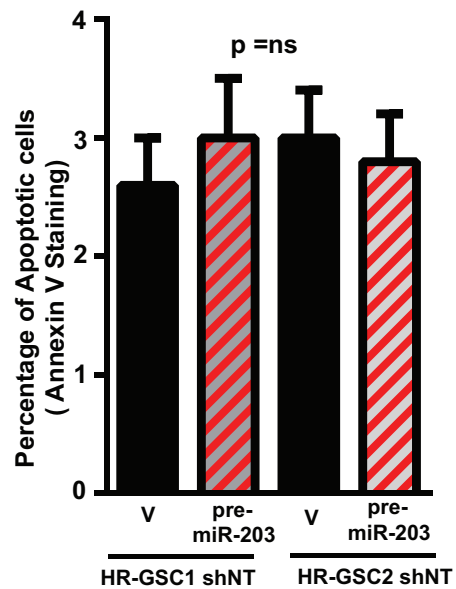

C

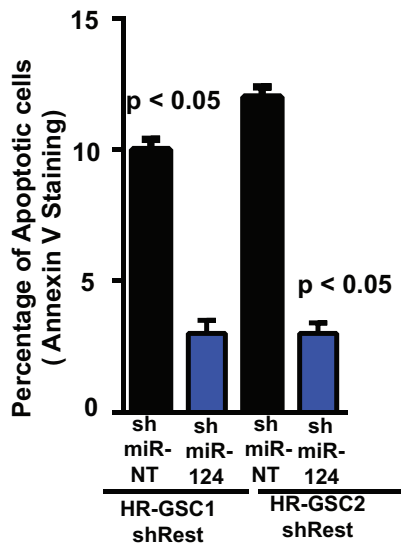

D

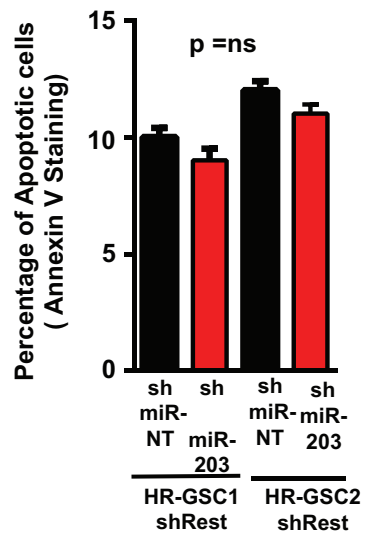

Supplement: now232_suppl_supplementary_figure_s7.pdf [file now232_suppl_supplementary_figure_s7.pdf]

A

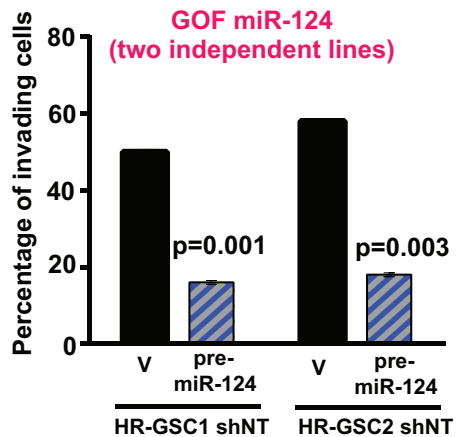

B

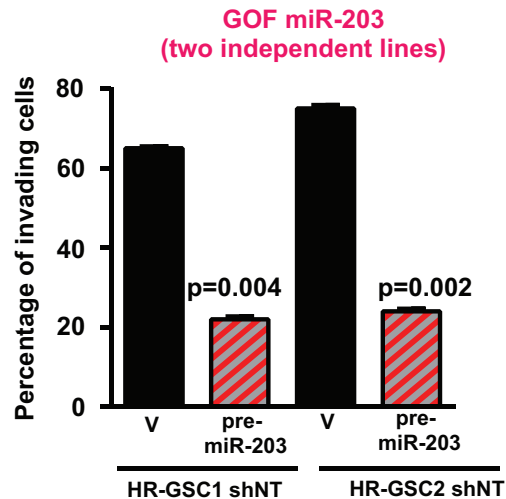

C

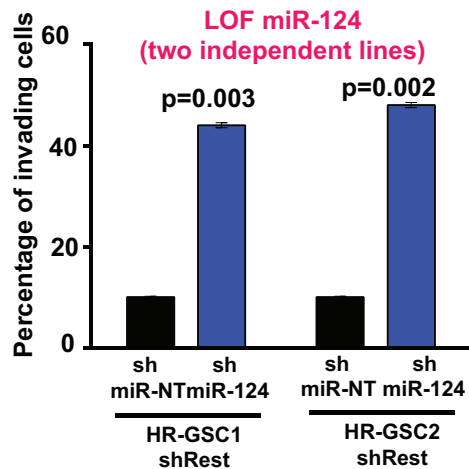

D

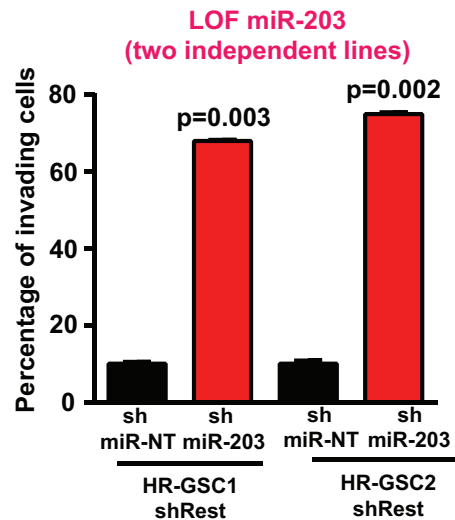

Supplement: now232_suppl_supplementary_figure_s8.pdf [file now232_suppl_supplementary_figure_s8.pdf]
